# Supplementary material
Source: publisher figshare collection journal article supplement (https://tandf.figshare.com/ndownloader/files/17174666)
Supplement: Supplementary file 1 [file 17174666]

**Supplemental Material**

Reaction of dirhodium(II) tetraacetate with *S*-methyl-*L*-cysteine

**Table of Contents**

***Figure S1.*** FT-IR spectra of *top*) Rh2(AcO)4, *middle*) solid S-methyl-*L*-cysteine and.................S2
*bottom*) crystals of [Rh2(AcO)4(*L*-HSMC)2]⋅3H2O (**3**⋅3H2O).

***Calculation of Stability Constants for Rh2(AcO)4 – HSMC Adducts***.........................................S3

***Figure S2.*** UV-vis peak fitting of bands at 279 and 304 nm (from Figure 1) .......................S3, S4

***Table S1.*** Peak area from UV-vis peak fittings (from Figure S2).................................................S5

***Table S2.*** Calculated relative concentrations of Rh(II) species and formation constants……….S6

***Table S3.*** Crystal data and structure refinement for complex (**3** + 3H2O)....................................S7

***Table S4*.** Selected bond lengths (Å) and angles (deg) for complex (**3** + 3H2O)..........................S8

***Figure S3.*** ESI-MS (+ ion mode) time study of the Rh2(AcO)4 – HSMC reaction at room temperature over 28 days S9

***Figure S4.*** ESI-MS (- ion mode) time study of the Rh2(AcO)4 – HSMC reaction at room temperature over 28 days S10

***Table S5.*** Assignment of mass peaks in the ESI-mass spectra shown in Figures S3 and S4 S11

***Figure S5.*** ESI-MS (+ and – ion modes) time study of the Rh2(AcO)4 – HSMC reaction at
40 °C over 4 days S12

***Figure S6.*** UV-vis spectrum of the Rh2(AcO)4 – HSMC reaction after reflux (100 °C) S13

***Figure S7.*** ESI-mass spectra (+ and - ion mode) of Rh2(AcO)4 – HSMC reaction after
reflux (100 °C) S13

***Figure S8.*** ESI-mass spectra (+ and - ion mode) of Rh2(AcO)4 – HSMC reaction (100 °C
reflux) after passing through Sephadex G-15 column S14


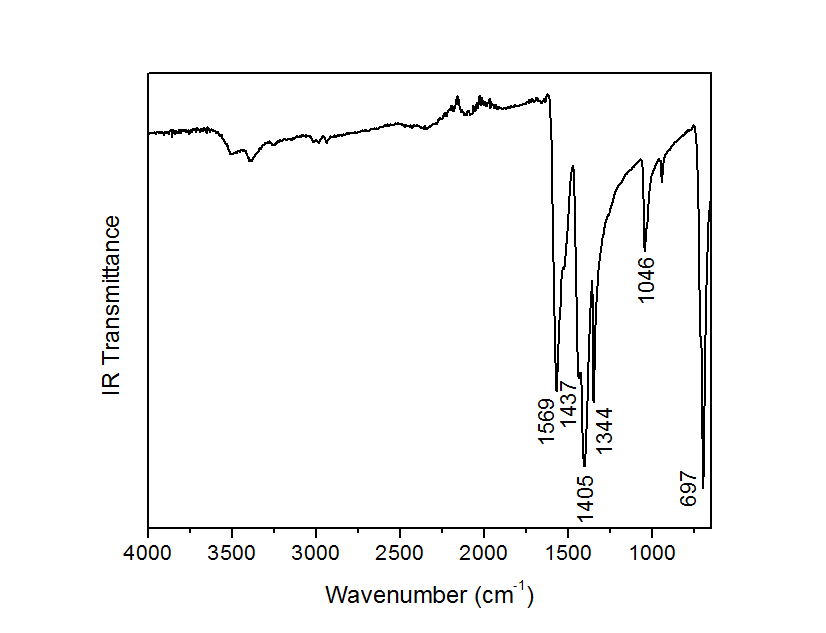

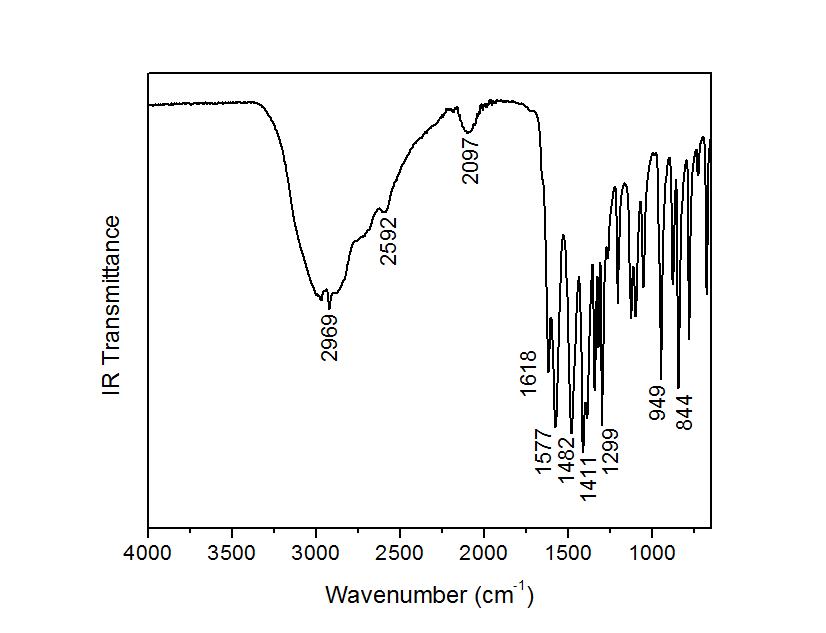

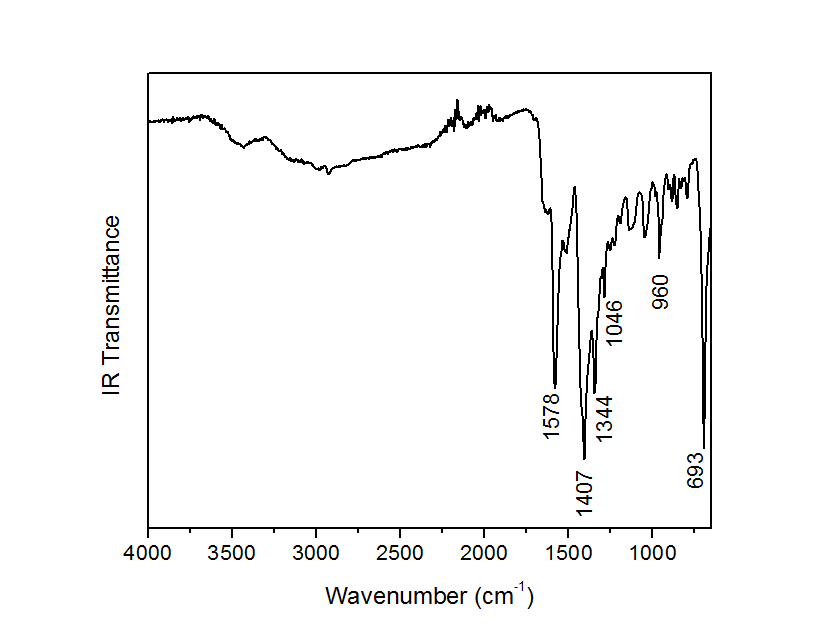


**Figure S1.** FT-IR spectra of solid samples: *top*) Rh2(AcO)4, *middle*) *S*-methyl-*L*-cysteine, and *bottom*) [Rh2(AcO)4(*L*-HSMC)2] (**3**; dried crystals).

**Calculation of Stability Constants for Rh2(AcO)4 Adducts with *S*-methyl-*L*-Cysteine**

The formation constants of adducts ([Rh2(AcO)4(H2O)(HSMC)] (**2**) and ([Rh2(AcO)4(HSMC)2] (**3**) were determined through peak fitting of the bands at 279 and 304 nm in the UV-vis spectra shown in Figure 1, using the Origin Pro program. The peak-fitting results are presented in Figure S2, and the relative peak areas are summarized in Table S1.


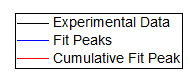

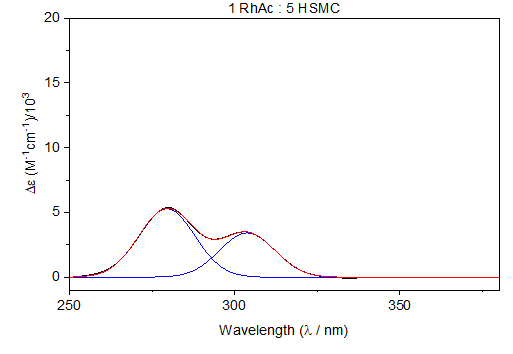

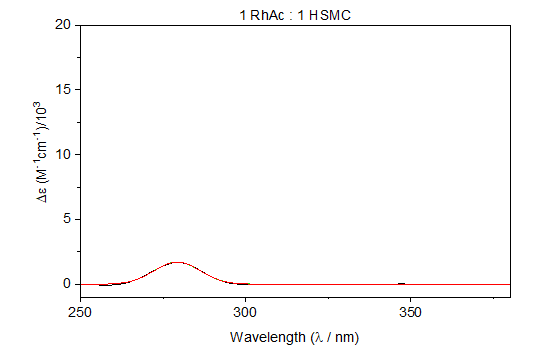


**Mole ratio 1:1**

**Mole ratio 1:5**


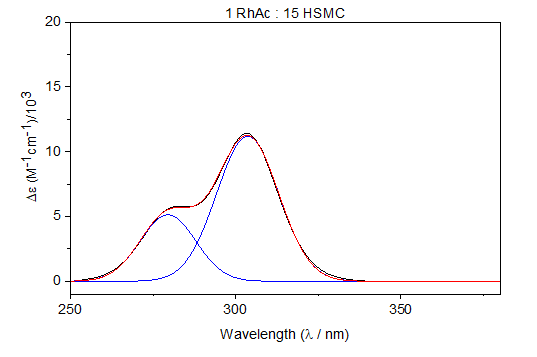

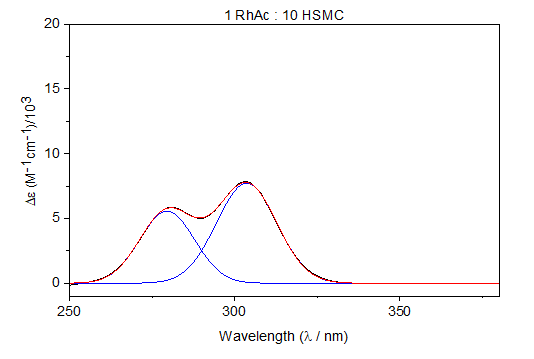


**Mole ratio 1:10**

**Mole ratio 1:15**

**Figure S2.** Fitting results of the peaks at 279 and 304 nm in the UV-vis absorption spectra obtained when titrating a 2.01 mM Rh2(AcO)4 with different mole ratios of *S*-methyl-*L*-cysteine (Figure 1). The peak-fitting procedure was perfomed in the 250-380 nm range, using Origin Pro program. Areas under theses peaks were also determined (see Table S1).


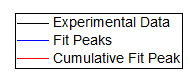

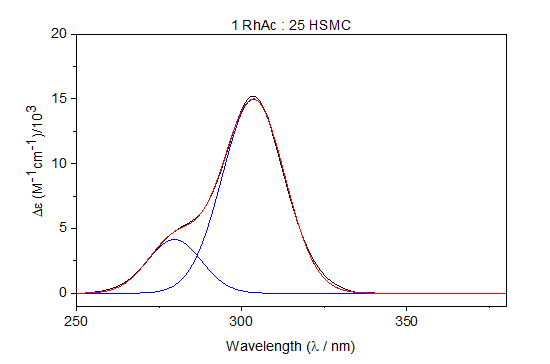

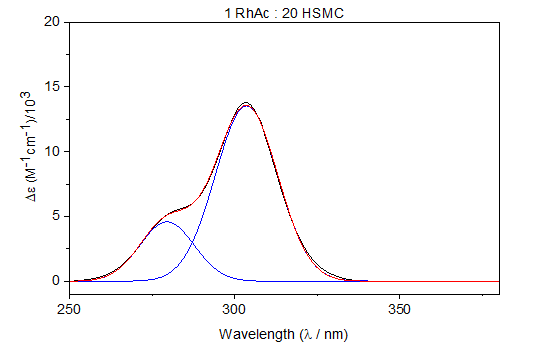


**Mole ratio 1:20**

**Mole ratio 1:25**


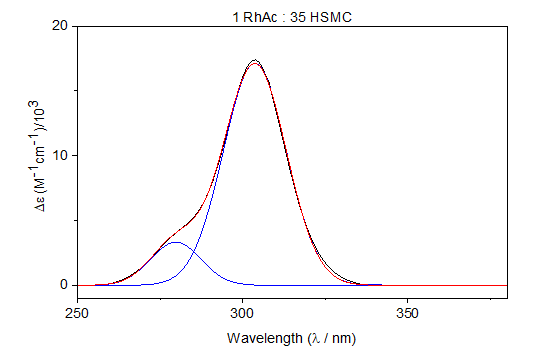

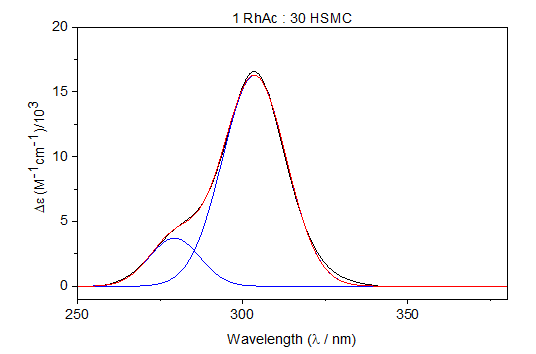


**Mole ratio 1:35**

**Mole ratio 1:30**


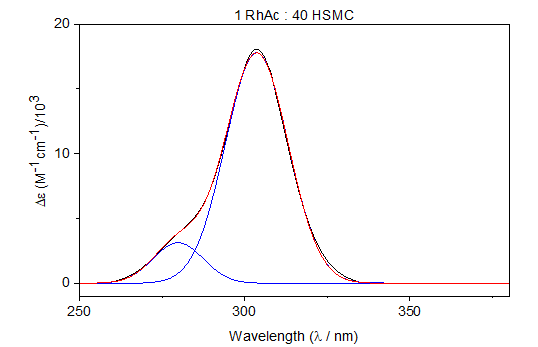


**Mole ratio 1:40**

**Figure S2 (*continued*).** Fitting results of the peaks at 279 and 304 nm in the UV-vis absorption spectra obtained when titrating a 2.01 mM Rh2(AcO)4 with different mole ratios of *S*-methyl-*L*-cysteine (Figure 1). The peak-fitting procedure was perfomed in the 250-380 nm range, using Origin Pro program. Areas under theses peaks were also determined (see Table S1).

**Table S1.** Peak areas (at 279 and 304 nm) from the fitting procedure in Figure S2, and the resulting relative percentages of the aqua, mono- and di-adducts in solution throughout the titration of Rh2(AcO)4 with *S*-methyl-*L*-cysteine, monitored by UV-vis spectroscopy (Figure 1).

| Rh2(AcO)4 : HSMC Mole ratio | Peak area (279 nm) | Peak area (304 nm) | Rh2(AcO)4(H2O)2 (%) | Adduct **2** (%) | Adduct **3** (%) |
| --- | --- | --- | --- | --- | --- |
| 1 : 1 | 29.95964 |  | ~ 89 | 6 | ~5 *a* |
| 1 : 5 | 112.09159 | 71.49623 | 62 | 23 | 15 |
| 1 : 10 | 115.74142 | 175.9307 | 40 | 24 | 36 |
| 1 : 15 | 108.26937 | 262.89636 | 23 | 22 | 55 |
| 1 : 20 | 94.72852 | 320.146 | 14 | 20 | 66 |
| 1 : 25 | 84.71037 | 353.97618 | 9 | 18 | 73 |
| 1 : 30 | 71.27064 | 393.54038 | < 5 | 15 | 82 |
| 1 : 35 | 63.48114 | 408.28757 | < 5 | 13 | 85 |
| 1 : 40 | 59.46218 | 422.67291 | 0 *b* | 12 | 88 |

*a* Estimated from the observed shift of the peak at 584 nm in the visible region. *b* Assumed to be negligible in presence of excess HSMC.

**Table S2.** Calculated relative concentrations* of the aqua, mono- and di-adducts, as well as [HSMC] in solution (Figure 1), based on the data in Table S1, and calculated formation constants.

| Rh2(AcO)4 : HSMC Mole ratio | Rh2(AcO)4(H2O)2 (mM) | Adduct **2** (mM) | Adduct **3** (mM) | [HSMC]total  (mM) | [HSMC]  (mM) | **K1** | **K2** |
| --- | --- | --- | --- | --- | --- | --- | --- |
| 1 : 1 | 1.78 | 0.12 | ~0.10 | 2.00 | 1.68 | 0.0401 |  |
| 1 : 5 | 1.24 | 0.46 | 0.30 | 10.00 | 8.94 | 0.0415 | 0.0730 |
| 1 : 10 | 0.80 | 0.48 | 0.72 | 20.00 | 18.08 | 0.0332 | 0.0830 |
| 1 : 15 | 0.46 | 0.44 | 1.10 | 30.00 | 27.36 | 0.0350 | 0.0914 |
| 1 : 20 | 0.28 | 0.40 | 1.32 | 40.00 | 36.96 | 0.0387 | 0.0893 |
| 1 : 25 | 0.18 | 0.36 | 1.46 | 50.00 | 46.72 | 0.0428 | 0.0868 |
| 1 : 30 | ~0.06 | 0.30 | 1.64 | 60.00 | 56.42 |  | 0.0969 |
| 1 : 35 | < 0.05 | 0.26 | 1.70 | 70.00 | 66.34 |  | 0.0986 |
| 1 : 40 | < 0.05 | 0.24 | 1.76 | 80.00 | 76.24 |  | 0.0962 |
|  |  |  |  |  |  |  |  |
| **Average** |  |  |  |  |  | 0.0385 ± 0.0038 | 0.0894 ± 0.0085 |

* The concentration of each Rh(II) species at equilibrium was calculated by multiplying their relative % (Table S1) by the total concentration of Rh2(AcO)4 (C**1** = 2.00 mM; see Figure 1).

Formation constants of adducts **2** and **3** were estimated based on the following equilibria:

[Rh2(AcO)4(H2O)2] + HSMC ↔ [Rh2(AcO)4(H2O)(HSMC)]

K1 = [**2**] / [Rh2(AcO)4(H2O)2] [HSMC]

[Rh2(AcO)4(H2O)(HSMC)]+ HSMC ↔ [Rh2(AcO)4(HSMC)2]

K2 = [**3**] / [**2**] [HSMC]

**Table S3.** Crystal data and structure refinement for [Rh2(AcO)4(*L*-HSMC)2]⋅3H2O (**3** + 3H2O).*a*

| Chemical formula | C16H36N2O15Rh2S2 |
| --- | --- |
| Formula weight (g mol-1) | 766.41 |
| Crystal system | Monoclinic |
| Space group | C2 |
| *a* (Å) | 29.572(4) |
| *b* (Å) | 14.403(2) |
| *c* (Å) | 8.2360(13) |
|  (deg) | 90 |
|  (deg) | 94.067(5) |
|  (deg) | 90 |
| *V* (Å3) | 3499.3(9) |
| *Z* | 4 |
| *D*calcd (g/cm3) | 1.455 |
| *T* (K) | 100 |
|  (Å) | 0.71073 (Mo K) |
| (μ / mm-1) | 1.118 |
| *F* (000) | 1552.0 |
| 2θrange for data collection (deg) | 3.146 – 56.806 |
| *R*1, *wR*2 [*I* > 2(*I*)] | 0.0440, 0.11195 |

*a R*1 = ║F0 – Fc║/ │F0│; *wR*2 = [*w*(F02 – Fc2)2 / [*w*(F02)2]1/2

**Table S4.** Selected bond lengths (Å) and angles (deg) for complex (**3** + 3H2O).

| Bond | Distance (Å) |
| --- | --- |
| Rh(1)-Rh(2) | 2.4010(7) |
| Rh(1)-S(1) | 2.475(2) |
| Rh(1)-O(5) | 2.045(7) |
| Rh(1)-O(7) | 2.057(8) |
| Rh(1)-O(9) | 2.042(7) |
| Rh(1)-O(11) | 2.052(6) |
| Rh(2)-S(2) | 2.483(2) |
| Rh(2)-O(6) | 2.037(7) |
| Rh(2)-O(8) | 2.020(7) |
| Rh(2)-O(10) | 2.028(7) |
| Rh(2)-O(12) | 2.029(7) |

| Bond angle | Degree |
| --- | --- |
| Rh(2)-Rh(1)-S(1) | 176.35(6) |
| O(5)-Rh(1)-Rh(2) | 88.16(18) |
| O(5)-Rh(1)-S(1) | 95.1(2) |
| O(7)-Rh(1)-Rh(2) | 88.52(19) |
| O(7)-Rh(1)-S(1) | 93.2(2) |
| O(9)-Rh(1)-Rh(2) | 87.65(19) |
| O(9)-Rh(1)-S(1) | 89.1(2) |
| O(11)-Rh(1)-Rh(2) | 86.99(19) |
| O(11)-Rh(1)-S(1) | 91.4(2) |
| Rh(1)-Rh(2)-S(2) | 178.35(6) |
| O(6)-Rh(2)-Rh(1) | 87.74(19) |
| O(6)-Rh(2)-S(2) | 91.6(2) |
| O(8)-Rh(2)-Rh(1) | 87.53(19) |
| O(8)-Rh(2)-S(2) | 91.0(2) |
| O(10)-Rh(2)-Rh(1) | 88.2(2) |
| O(10)-Rh(2)-S(2) | 92.5(2) |
| O(12)-Rh(2)-Rh(1) | 88.7(2) |
| O(12)-Rh(2)-S(2) | 92.8(2) |




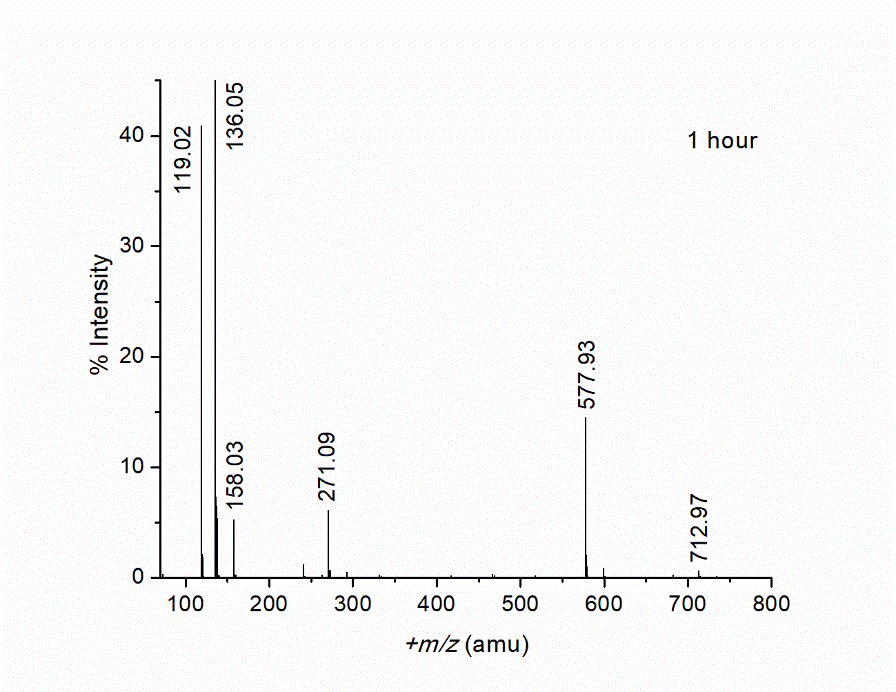


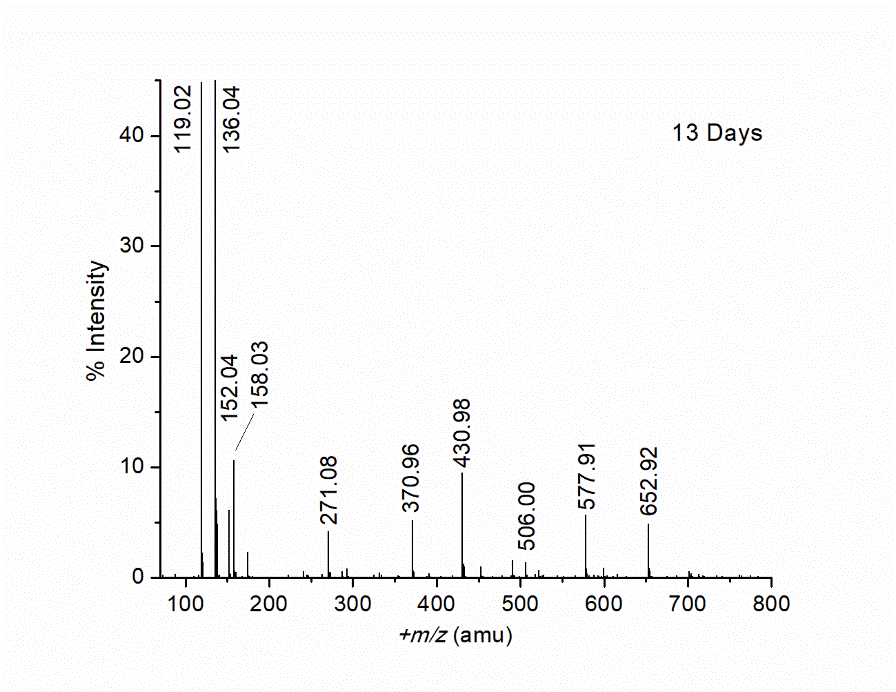

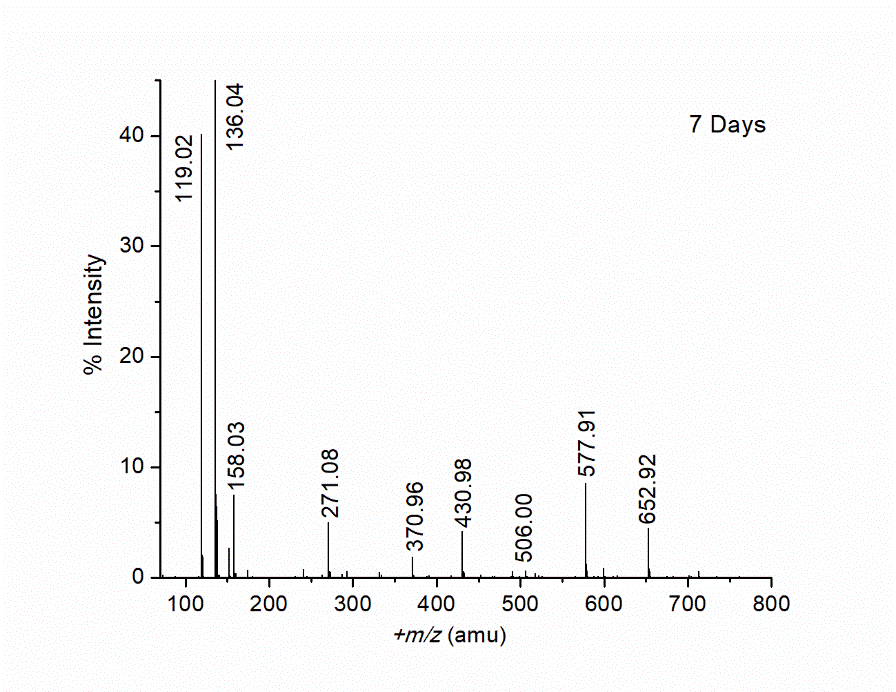


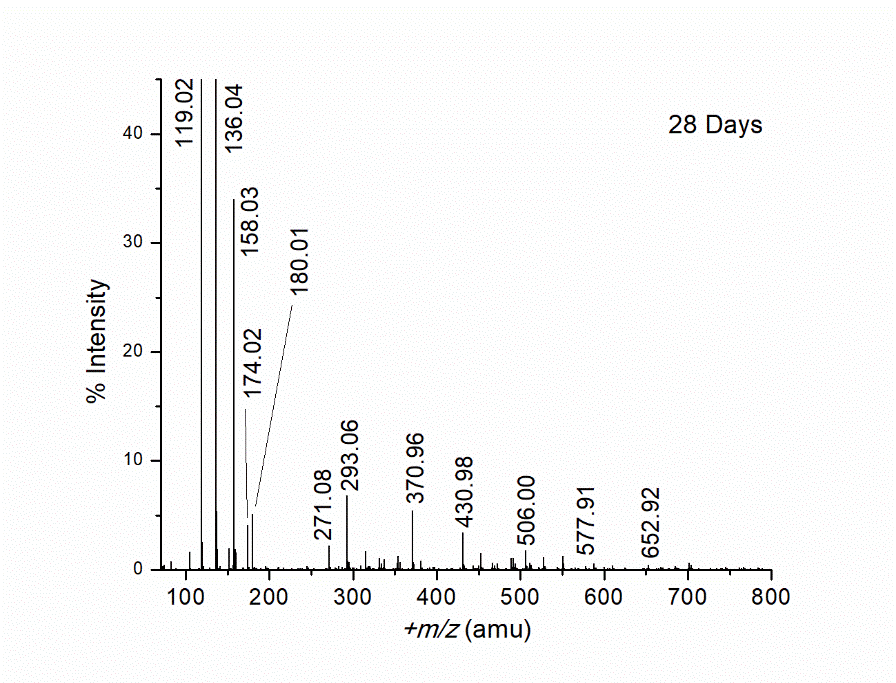
**



**







**Figure S3.** ESI-mass spectra (+ ion mode) of a Rh2(AcO)4 aqueous solution containing HSMC in excess (CRh2 = 2.01 mM, CHSMC = 79.8 mM; pH = 4.81; 25 °C) over a period of 28 days; for peak assignments, see Table S5. The mass peak at +m/z = 136.04 amu [HSMC + H+]+ was given 100% intensity. (Selected observed (at 13 days) and calculated isotopic patterns are also shown).


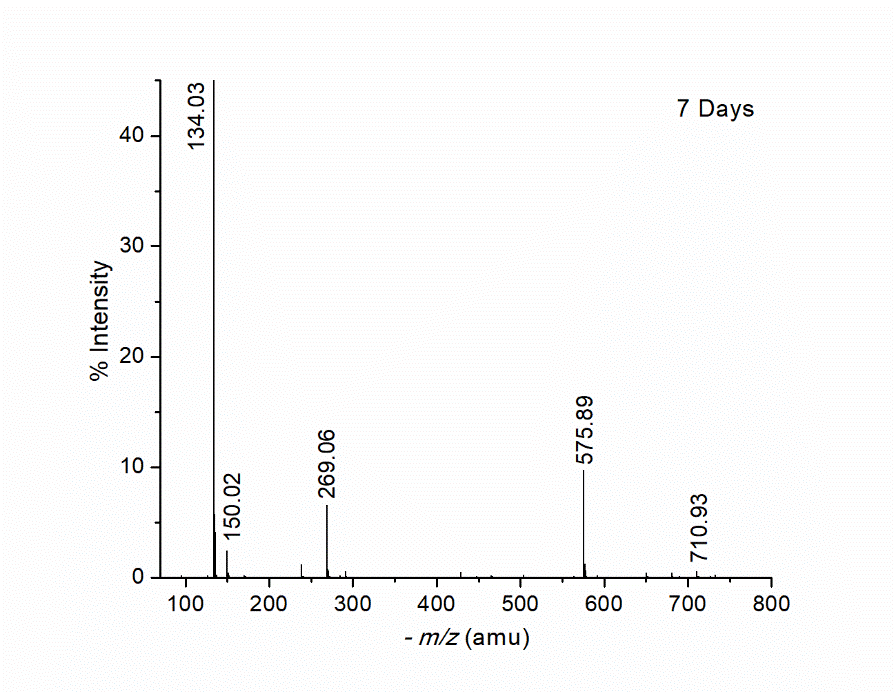

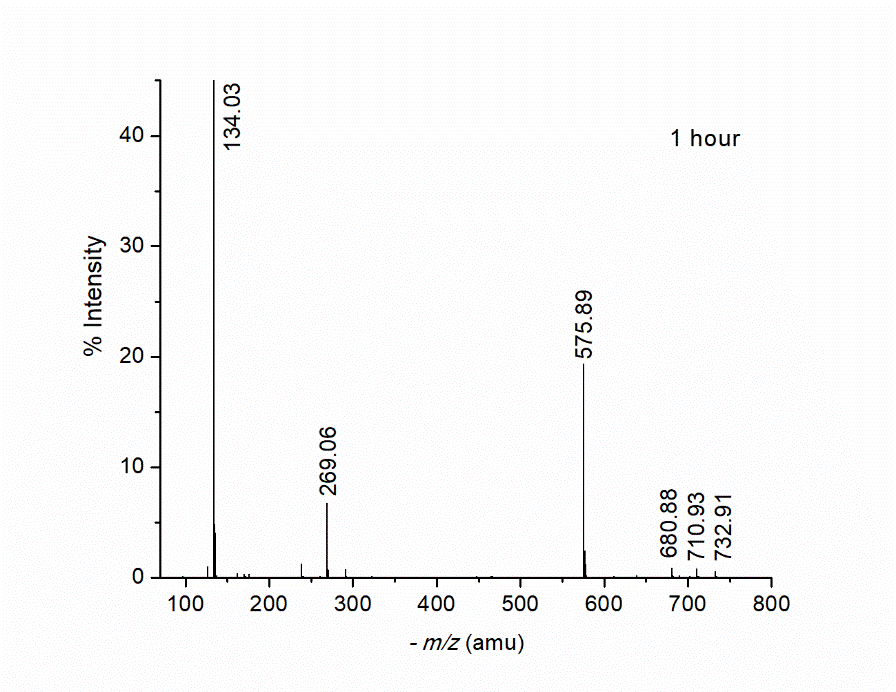


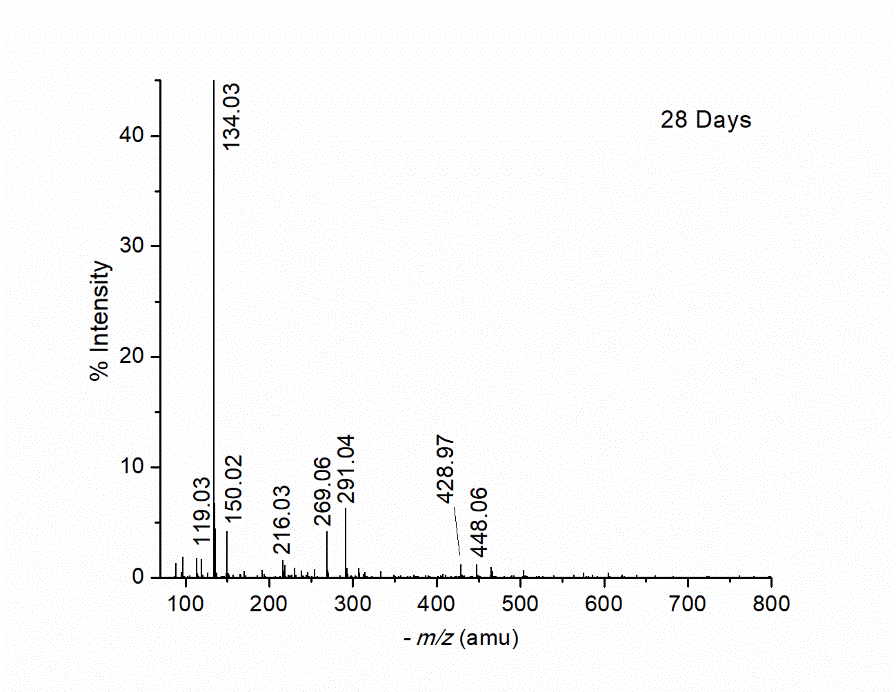

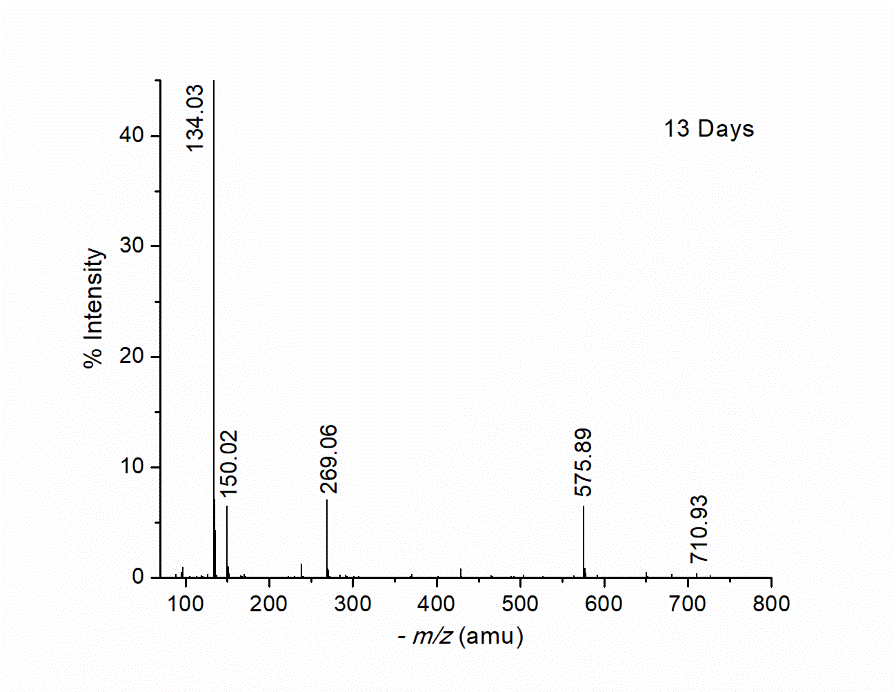


**Figure S4.** ESI-mass spectra (- ion mode) of a Rh2(AcO)4 aqueous solution containing excess *S*‑methyl-*L*-cysteine (*C*Rh2 = 2.01 mM*,* *C*HSMC = 79.8 mM*;* pH = 4.81; 25 °C) over a period of 28 days; for peak assignments, see Table S5. The mass peak at -*m/z* = 134.03 (SMC-) was given 100% intensity.

**Table S5.** Assignment of mass peaks in the ESI-mass spectra (+ and – ion modes) shown in Figures S3-S5 and S7. a

| *+m/z* | Assignment | *-m/z* | Assignment |
| --- | --- | --- | --- |
| 104.99 | [AcO- + 2Na+]+ |  |  |
| 119.02 | [HSMC – NH2]+ | 119.03 | [2AcO- + H+]- |
| 136.04 | [HSMC + H+]+ | 134.03 | SMC- |
| 152.04 | [HSMC + O + H+]+ | 150.02 | [SMC- + O]- |
| 158.03 | [HSMC + Na+]+ |  |  |
| 174.02 | [HSMC + Na+ + O]+ | 170.00 | [HSMC + Cl-]- |
| 180.01 | [SMC- + 2Na+]+ |  |  |
|  |  | 216.03 | [SMC- + AcO- + Na+]- |
| 271.08 | [2HSMC+ H+]+ | 269.06 | [2HSMC - H+]- |
| 293.06 | [2HSMC + Na+]+ | 291.04 | [2SMC- + Na+]- |
| 370.96 | [RhIII + 2SMC-]+ |  |  |
| 430.98 | [RhIII + 2SMC- + AcO- + H+]+ | 428.97 | [RhIII + 2SMC- + AcO- - H+]- |
|  |  | 448.06 | [3SMC- + 2Na+]- |
| 506.00 | [RhIII + 3SMC- + H+]+ |  |  |
| 577.91 | [2RhII + HSMC + 4AcO- + H+]+ | 575.89 | [2RhII + HSMC + 4AcO- - H+]- |
| 599.89 | [2RhII + HSMC + 4AcO- + Na+]+ |  |  |
|  |  | 639.01 | [RhIII + 4SMC-]- |
| 652.92 | [2RhII + 2HSMC + 3AcO-]+ |  |  |
| 712.97 | [2RhII + 2HSMC + 4AcO- + H+]+ | 710.93 | [2RhII + 2HSMC + 4AcO- - H+]- |

*a* HSMC = C4H9NO2S; AcO- = CH3COO-


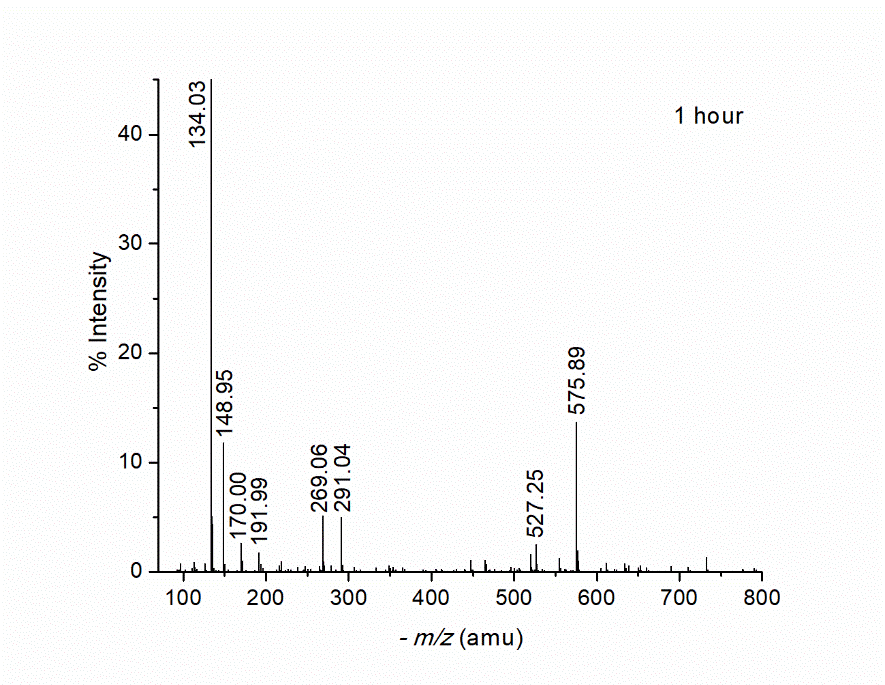

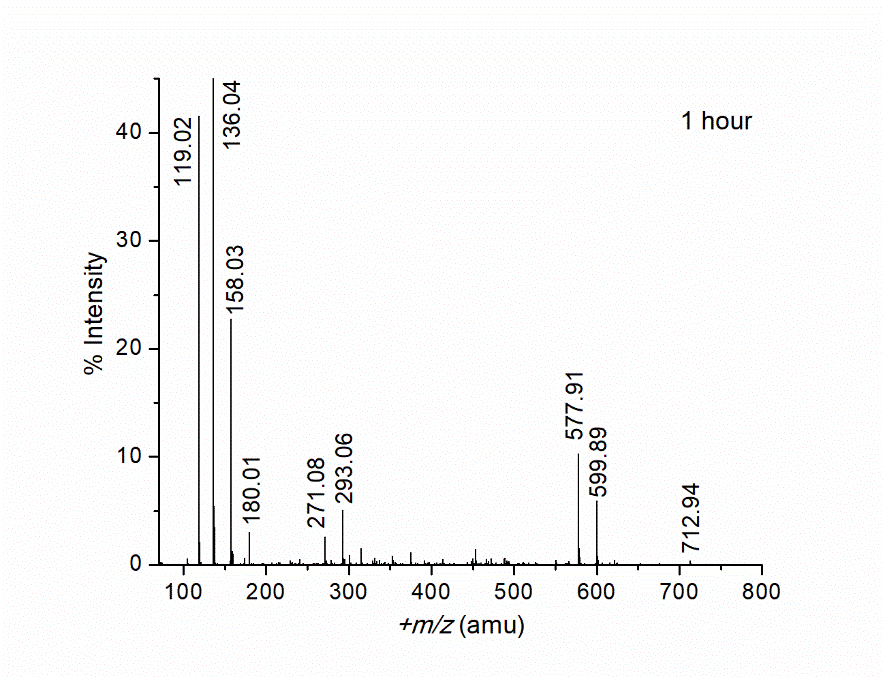







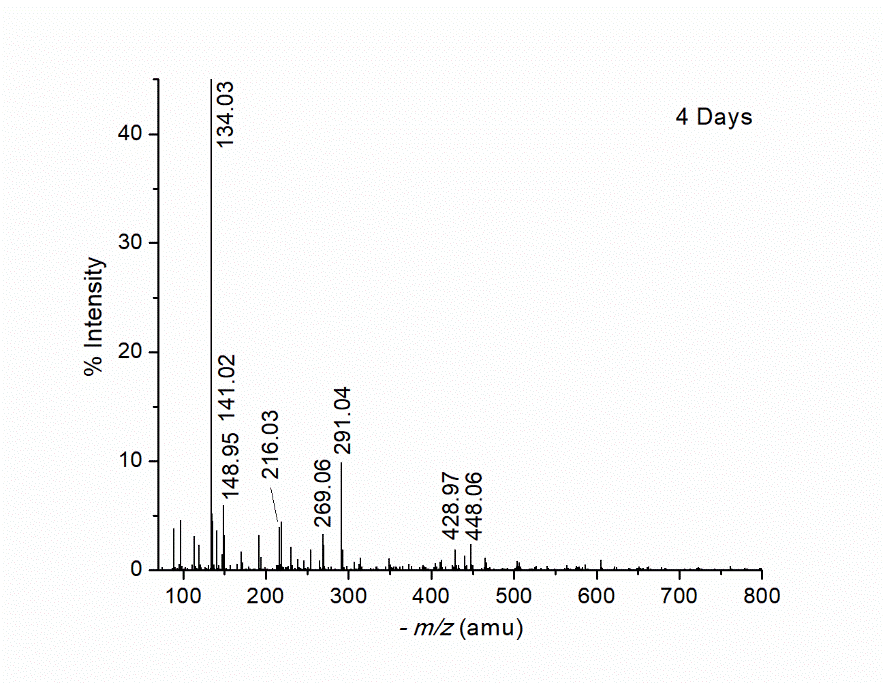

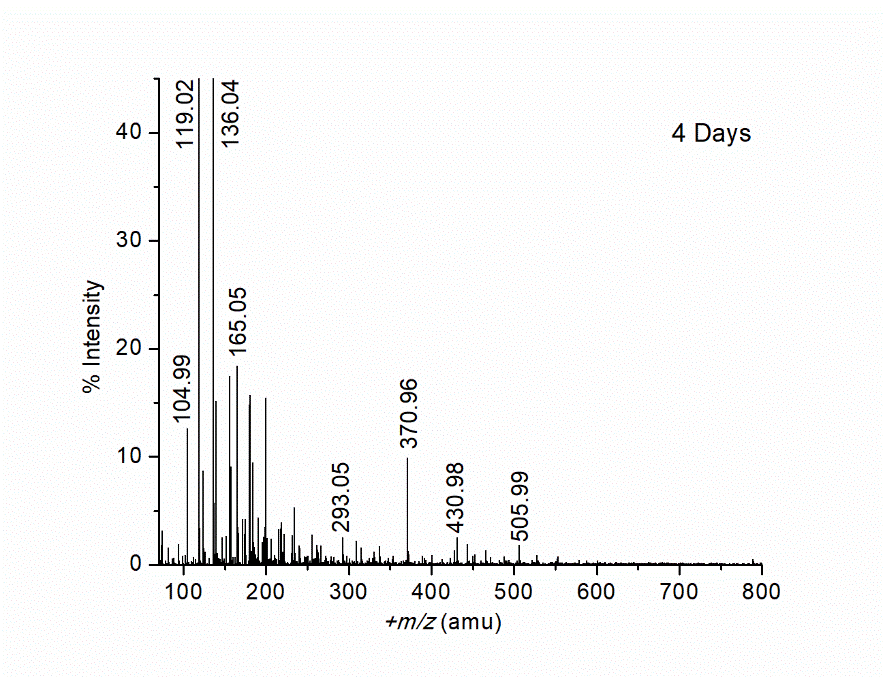


**Figure S5.** *Left*) (+) ion mode, and *right*) (-) ion mode ESI-mass spectra of a [Rh2(AcO)4 solution with excess *S*-methyl-*L*-cysteine (*C*Rh2 = 2.01 mM*,* *C*SMC = 79.8 mM; pH = 4.81; 40 °C) at 1 h, 24 h and 4 days after initial mixing. The mass peaks at +*m/z* = 136.03 [HSMC + H+]*+* and -*m/z* = 134.03 (SMC-) were assigned 100% intensity. For peak assignments, see Table S5.


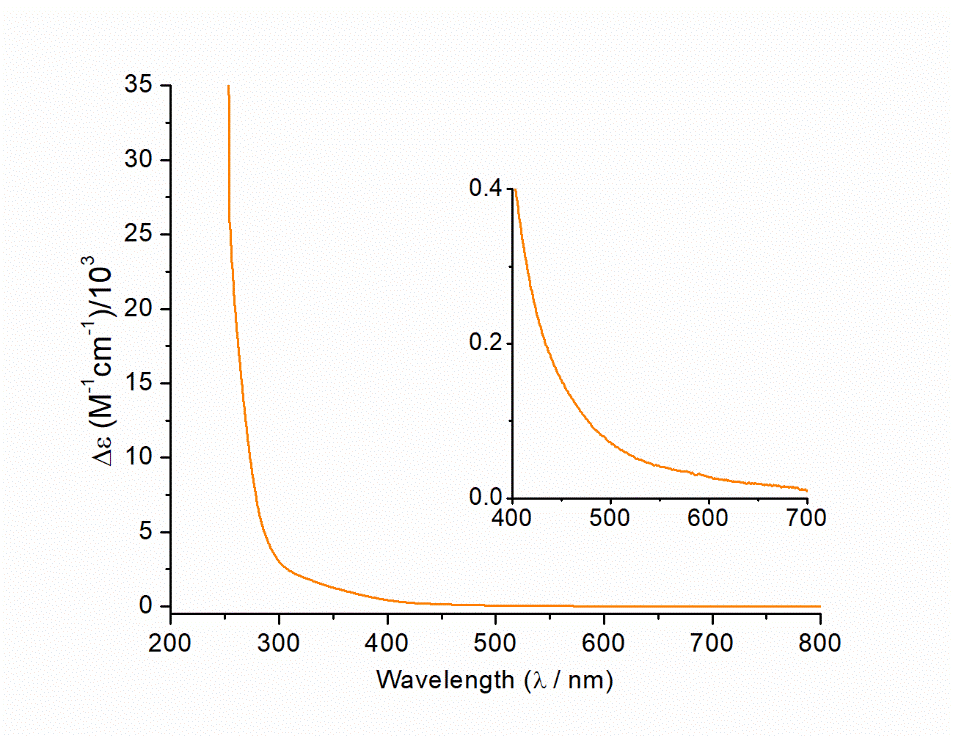


**Figure S6.** UV-vis absorption spectrum of Rh2(AcO)4 in aqueous solution with excess S-methyl-L-cysteine (CRh2 = 2.01 mM, CHSMC = 79.8 mM; pH = 4.81) after 1 h reflux at 100 °C.


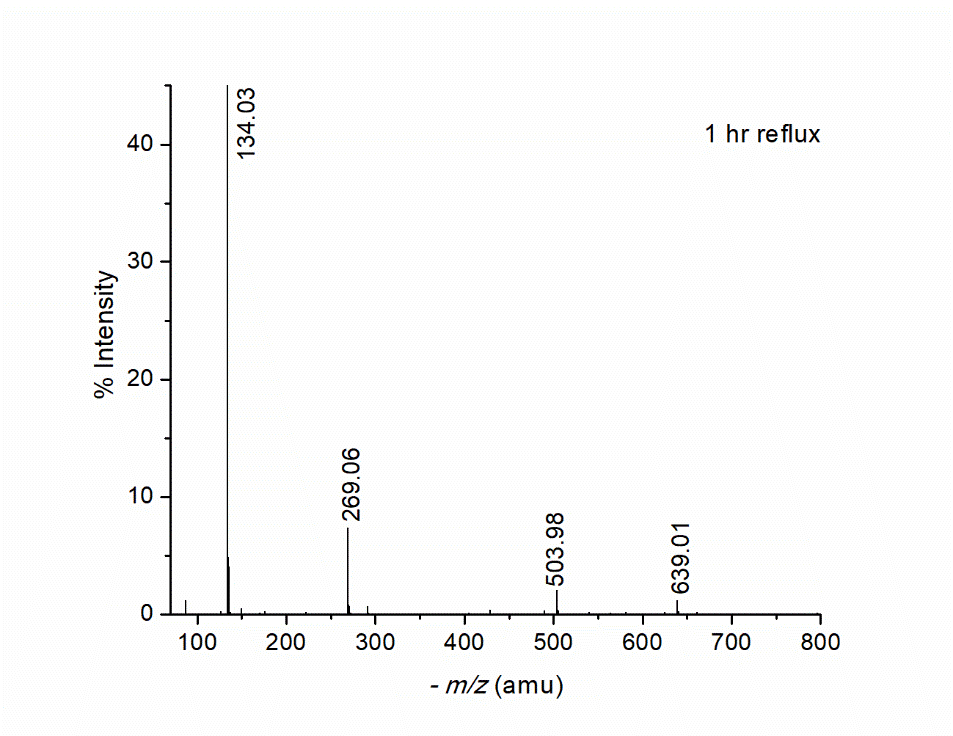

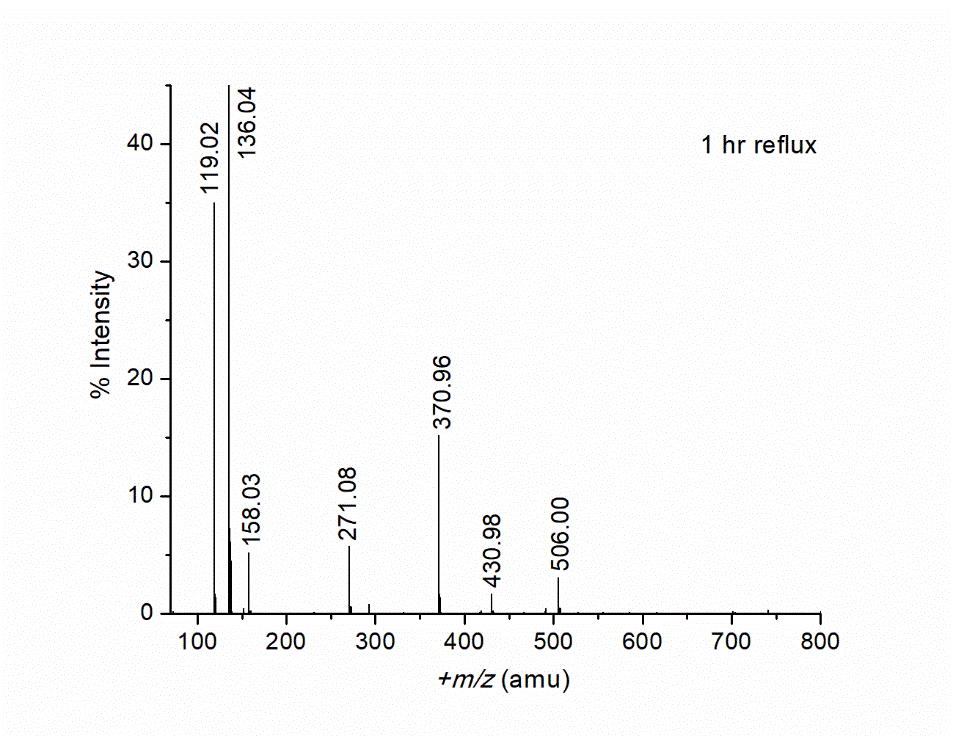


**Figure S7.** *Left*) (+) ion mode, and *right*) (-) ion mode ESI-mass spectra of Rh2(AcO)4 in aqueous solution with *S*-methyl-*L*-cysteine in excess (*C*Rh2 = 2.01 mM, *C*HSMC = 79.8 mM; pH 4.81) after 1 h reflux at 100 °C. The mass peaks at +*m/z* = 136.03 (HSMC + H+)+ and -*m/z* = 134.03 (SMC-) were given 100% intensity. For peak assignments, see Table S5.







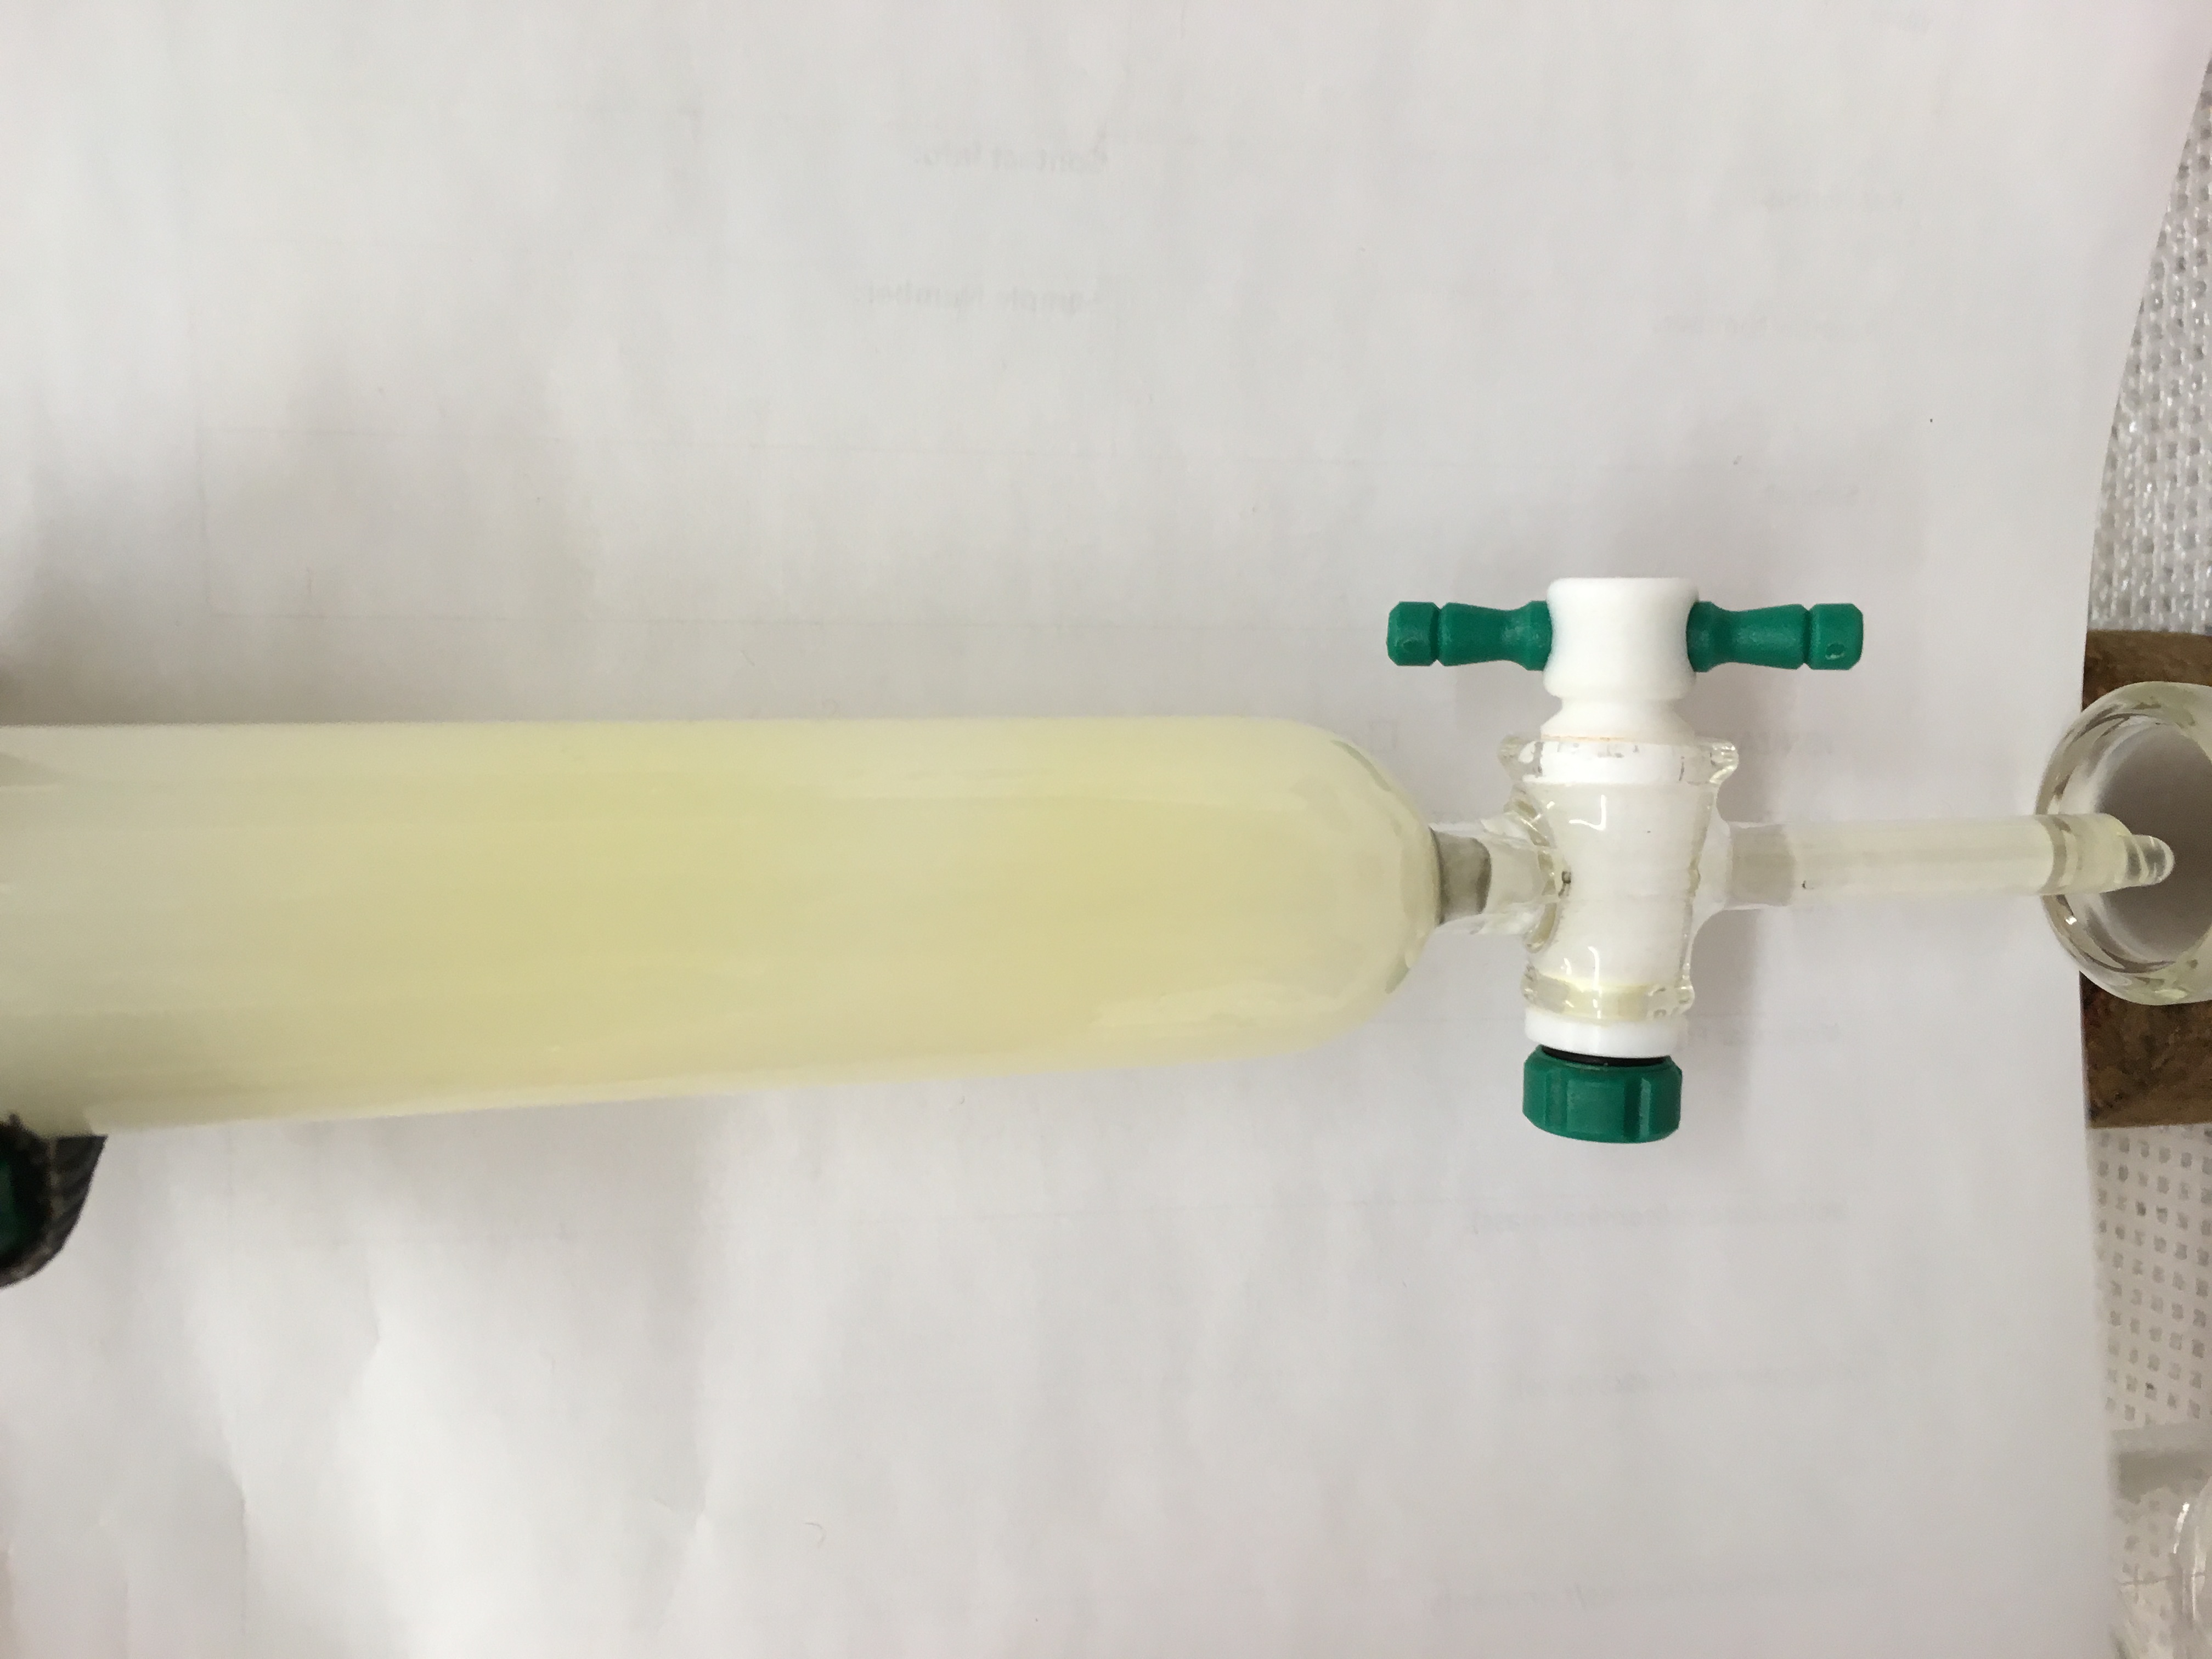

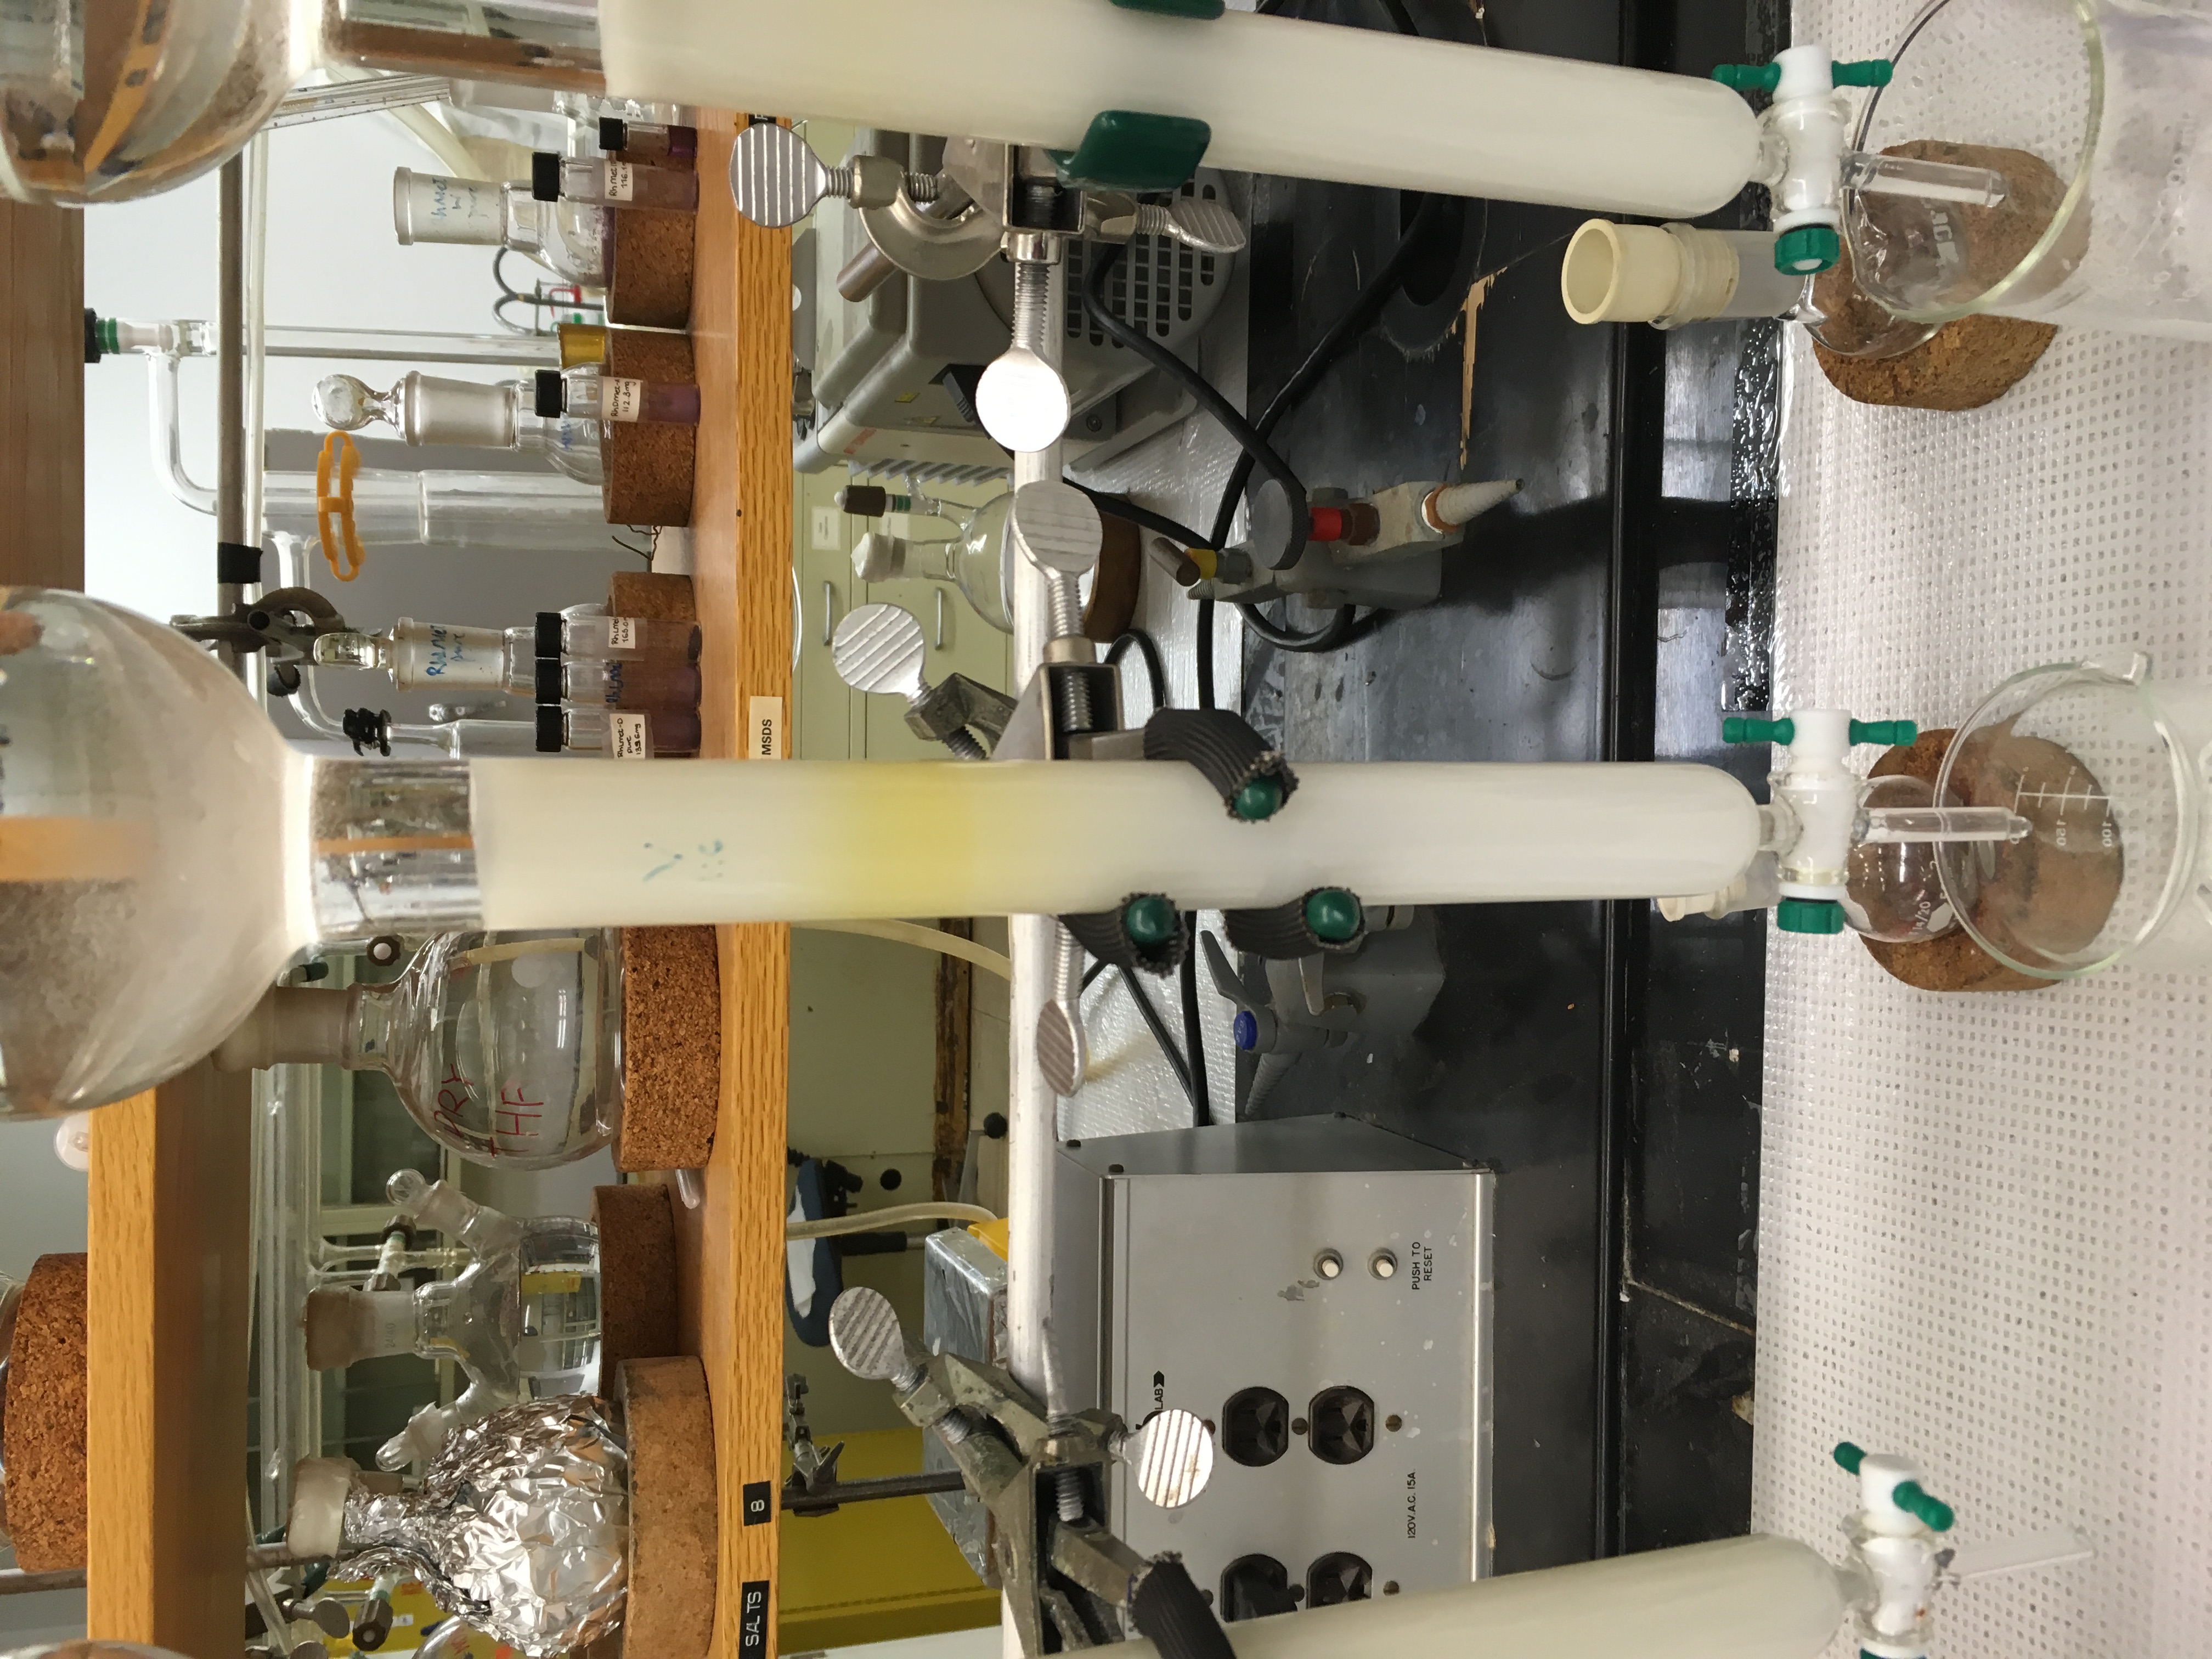

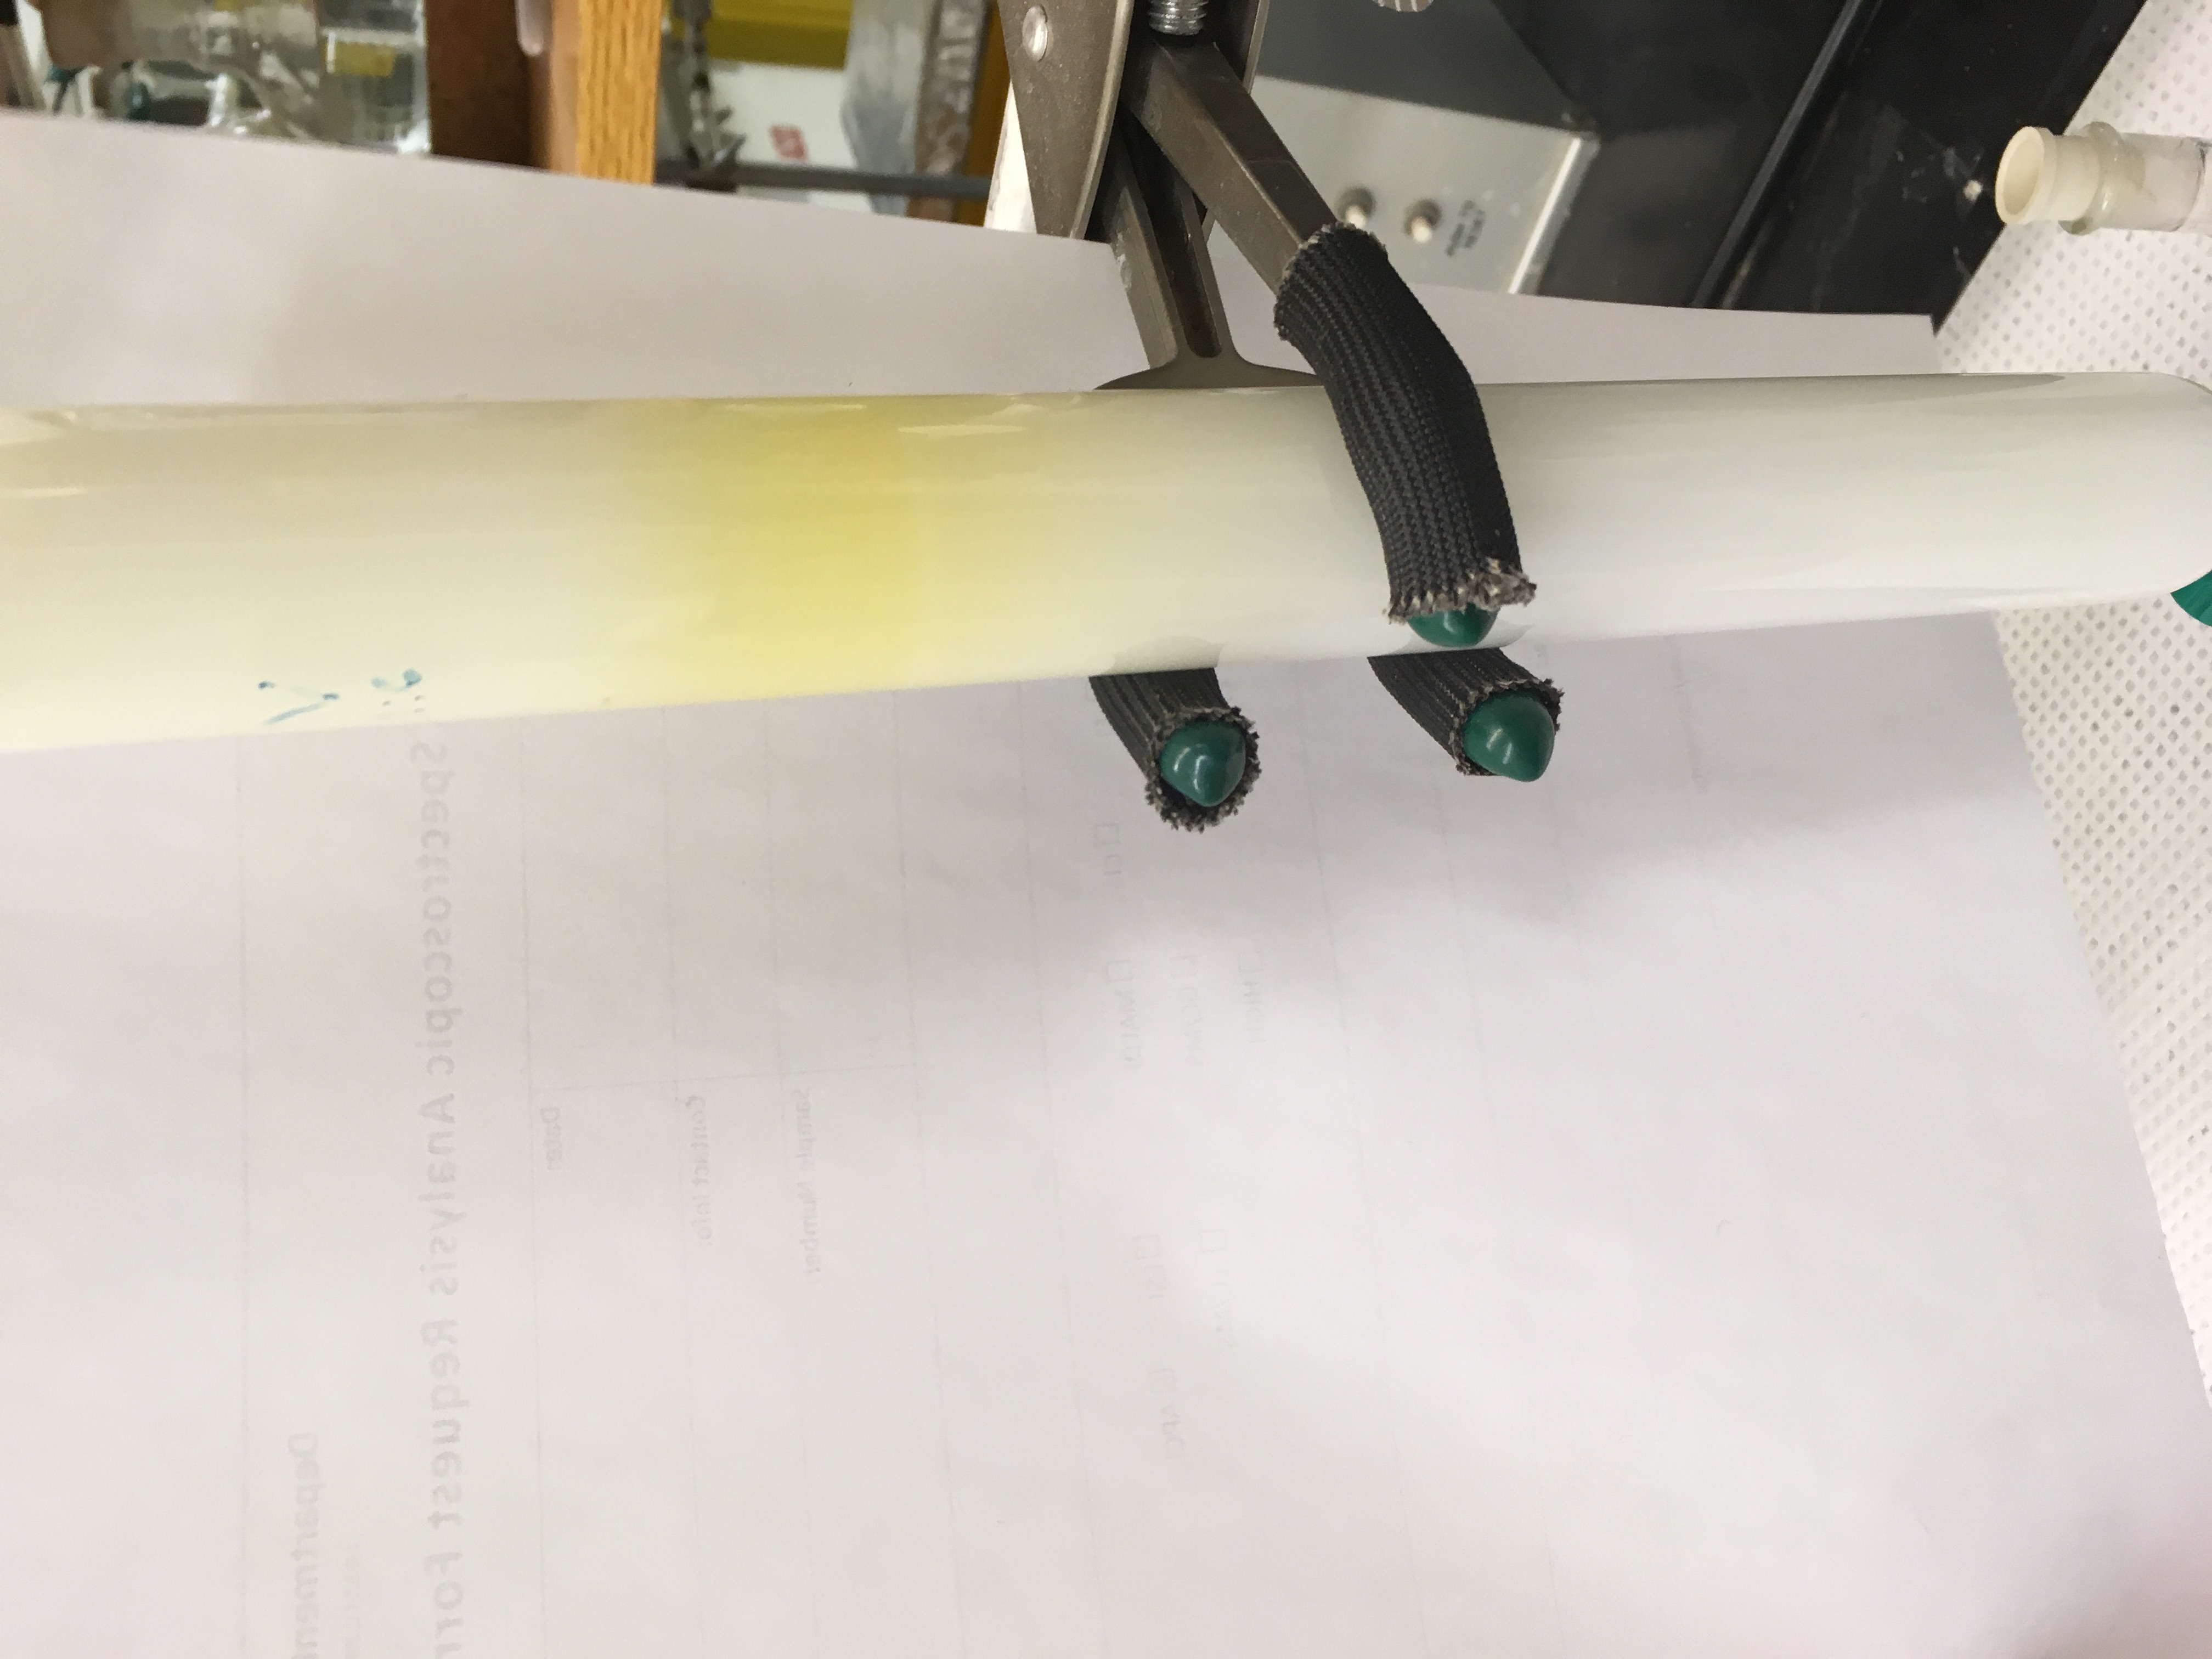


Band ***1***

Band ***1***

**Figure S8.** *Top**Left*) (+) ion mode, and *Top right*) (-) ion mode ESI-mass spectra of Rh2(AcO)4 in aqueous solution with *S*-methyl-*L*-cysteine in excess (*C*Rh2 = 2.01 mM, *C*HSMC = 79.8 mM; pH 4.81) after 1 h reflux at 100 °C, and after passing through a size exclusion Sephadex G-15 column (Band ***1***). The mass peaks at +*m/z* = 136.03 (HSMC + H+)+ and -*m/z* = 134.03 (SMC-) were given 100% intensity. For peak assignments, see Table S5.
